# Supplementary material
Source: PubMed Central journal article supplement (PMC3204851)
Supplement: JCI59353sd.pdf [file JCI59353sd.pdf]

Mouse model of enlarged vestibular aqueducts defines temporal requirement of *Slc26a4* expression for hearing acquisition

Byung Yoon Choi,<sup>1</sup> Hyoung-Mi Kim,<sup>2</sup> Taku Ito,<sup>3</sup> Kyu-Yup Lee,<sup>3</sup> Xiangming Li,<sup>2</sup> Kelly Monahan,<sup>3</sup> Yaqing Wen,<sup>3</sup> Elizabeth Wilson,<sup>1</sup> Kiyoto Kurima,<sup>3</sup> Thomas L. Saunders,<sup>4</sup> Ronald S. Petralia,<sup>5</sup> Philine Wangemann,<sup>2</sup> Thomas B. Friedman,<sup>1</sup> and Andrew J. Griffith<sup>3</sup>

<sup>1</sup>Laboratory of Molecular Genetics, National Institute on Deafness and Other Communication Disorders, National Institutes of Health, Rockville, Maryland, USA.

<sup>2</sup>Anatomy and Physiology Department, Kansas State University, Manhattan, Kansas, USA. <sup>3</sup>Otolaryngology Branch, National Institute on Deafness and Other Communication Disorders, National Institutes of Health, Rockville, Maryland, USA.

<sup>4</sup>Transgenic Animal Model Core, University of Michigan Medical School, Ann Arbor, Michigan, USA. <sup>5</sup>Laboratory of Neurochemistry, National Institute on Deafness and Other Communication Disorders, National Institutes of Health, Bethesda, Maryland, USA.

**Supplemental data**

### Supplemental Figure 1

Cross-sectional morphology of the vestibular aqueduct. Original microscopic images of *Slc26a4*<sup>Δ/+</sup> control (A), Tg[E];Tg[R];*Slc26a4*<sup>Δ/Δ</sup> IE16.5 (B), Tg[E];Tg[R];*Slc26a4*<sup>Δ/Δ</sup> IE18.5 (C), or *Slc26a4*<sup>Δ/Δ</sup> control mice (D) used in making images with overlays in Figure 6 (A for E, B for F, C for G and D for H). VA, vestibular aqueduct; CC, common crus.

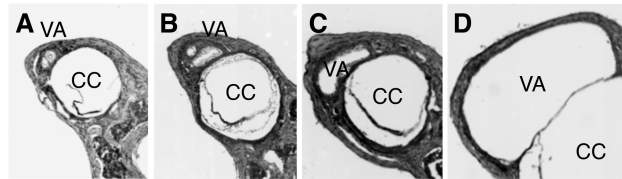

**Supplemental Table 1. Primer sequences.**

| Primer | Sequence                                                                         |
|--------|----------------------------------------------------------------------------------|
| 92     | 5'-CATCCCTCGTCGCATCCCCTCCAGGCCGGCGGTCTCGGGTACGCAGGCCACCATGTCTAGACTGGACAAG-3'     |
| 93     | 5'-CAGCTGTACTCGGCGAGCTGCGGCGGCTCCGACCTGCCGCCCGCGCTGCTCACTCAGGAGAGCGATAACTTCGT-3' |
| 127-2  | 5'-CTTCGTCAGGATCAACGAGA-3'                                                       |
| 128-2  | 5'-AAAACCTGTCTACCAATGCAG-3'                                                      |
| 189    | 5'-CGATTCGGATCCGCCACCATGGCAGCGCGGGGCGGCAGGTCGG-3'                                |
| 200    | 5'-CGATTCGCGGCCGCTCAGGAAGCAAGTCTACGCATGGCCTC-3'                                  |
| 113    | 5'-GGCCGCTAATACGACTCACT-3'                                                       |
| 114    | 5'-TTCTTTCTGCAAACCAGCA-3'                                                        |
| 115    | 5'-TCCAGCCTCTCTTAAAGTGC-3'                                                       |
| 116    | 5'-CCGTCGACATTTAGGTGACA-3'                                                       |
| 177    | 5'-TGTAAGACCCTCTTGATCTGATG-3'                                                    |
| 178    | 5'-CCTGATTCTGTGGATAACCGTAT-3'                                                    |
| 806    | 5'-GCGGCCGCATCGATAAG-3'                                                          |
| 808    | 5'-TGTGGTATGGCTGATTATGATCCT-3'                                                   |
